# Supplementary material
Source: ML conference proceedings conference paper supplement (https://proceedings.neurips.cc/paper_files/paper/2020/hash/6b39183e7053a0106e4376f4e9c5c74d-Abstract.html)
Supplement: Supplementary file [file 6b39183e7053a0106e4376f4e9c5c74d-Supplemental.zip]

---

## Supplementary Material - Additional Results

---

Please watch the illusions on a computer screen.

Additional examples of contrast-like illusions:

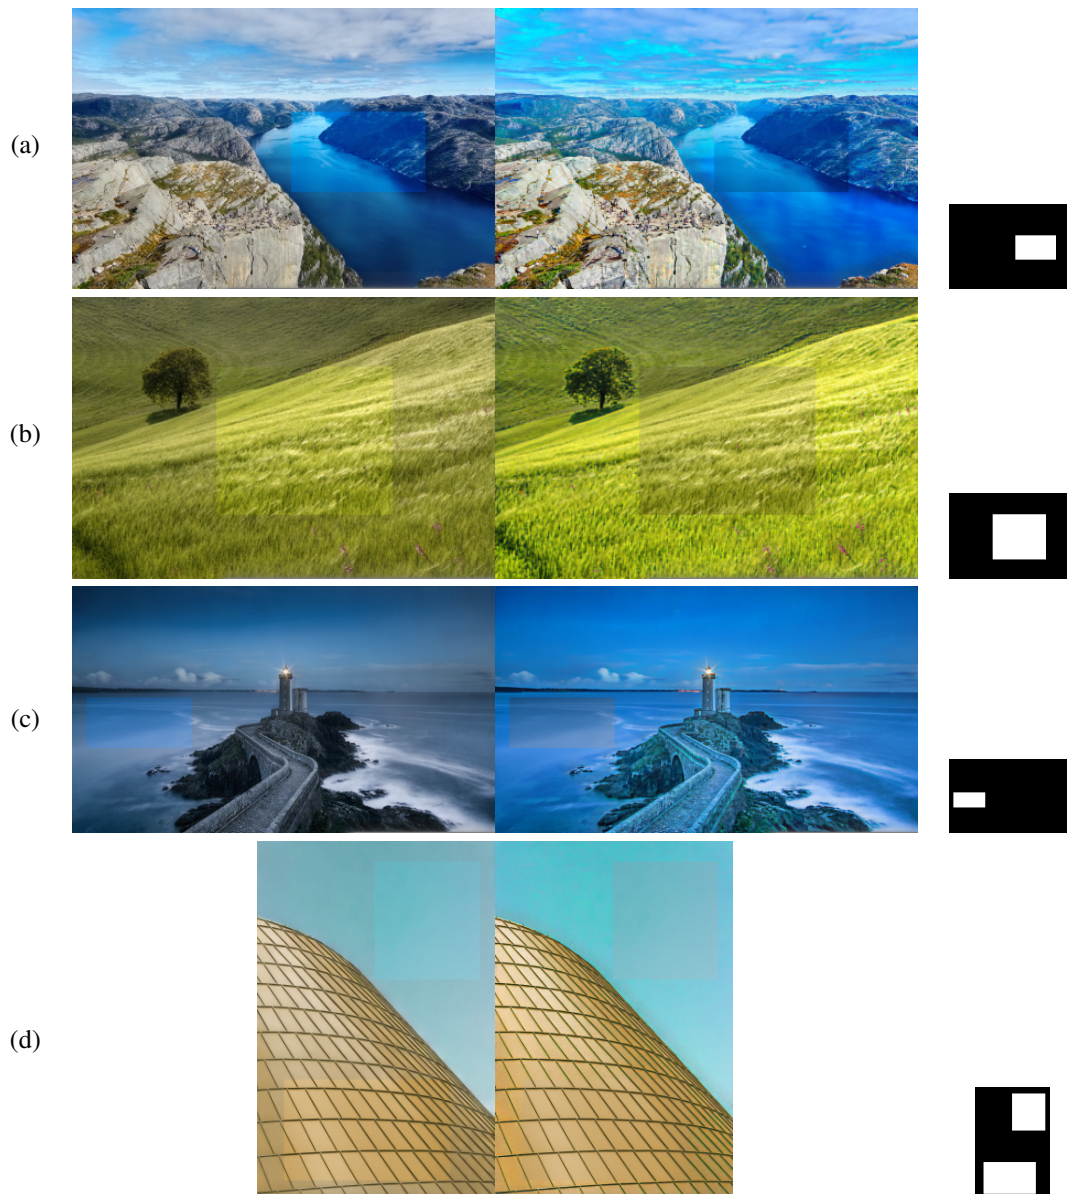

(e)

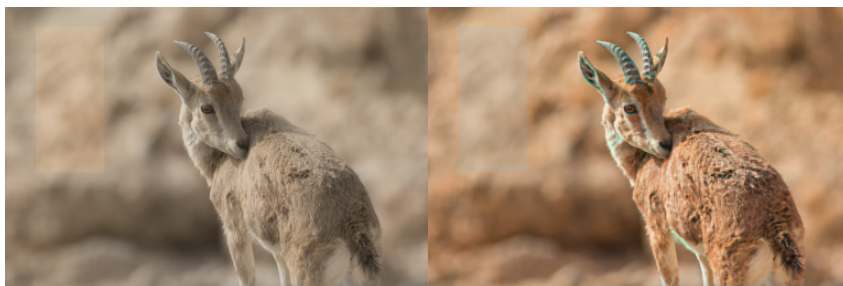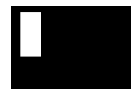

(f)

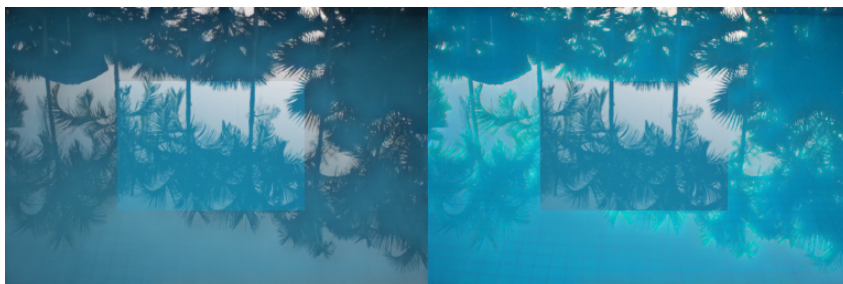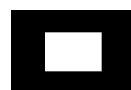

(g)

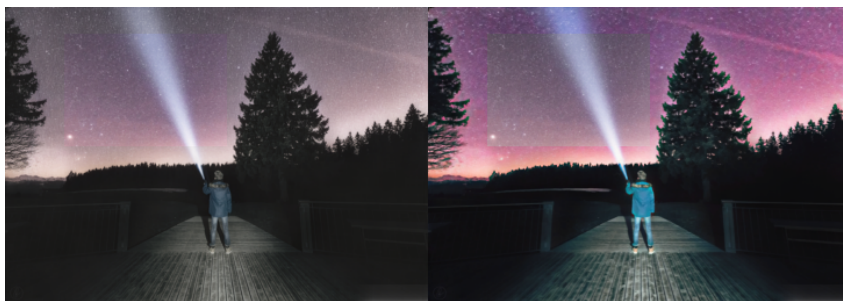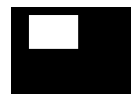

(h)

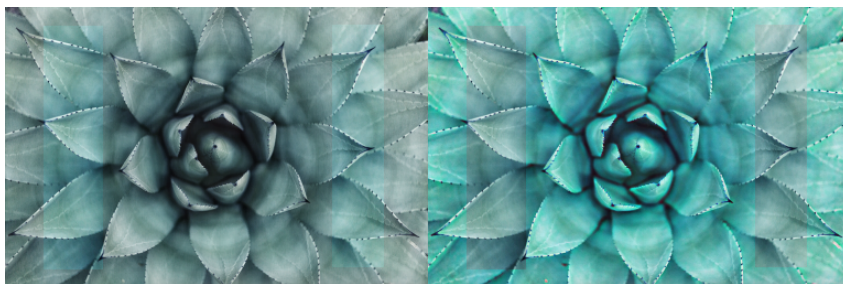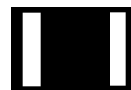

(i)

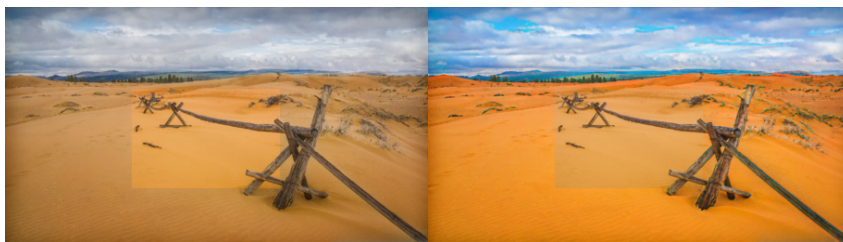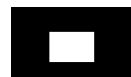

(j)

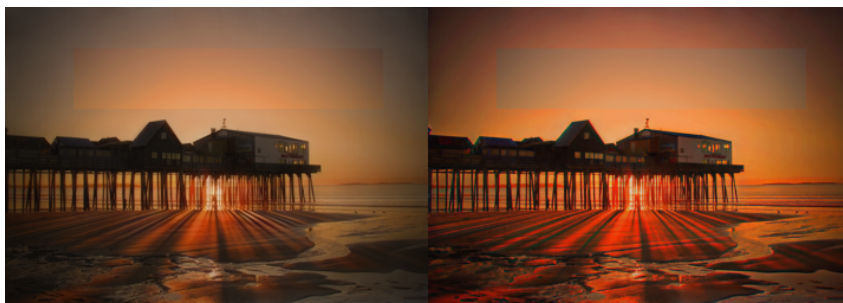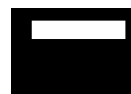

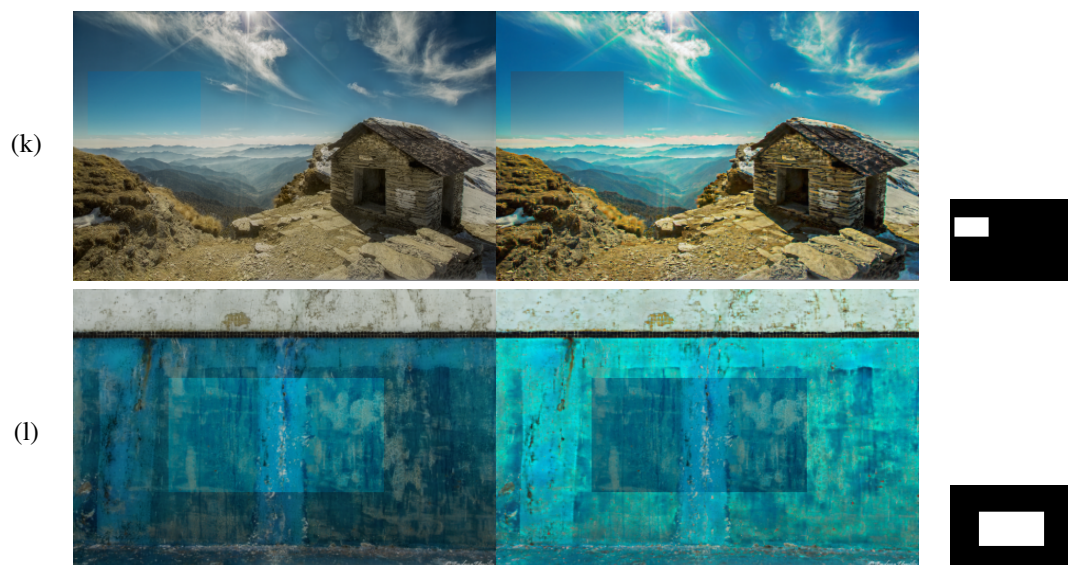

Figure 1: **Contrast-like visual illusions.** (a-l) The masked (white) area is the same in the left and right images.



Additional examples of White-like illusions:

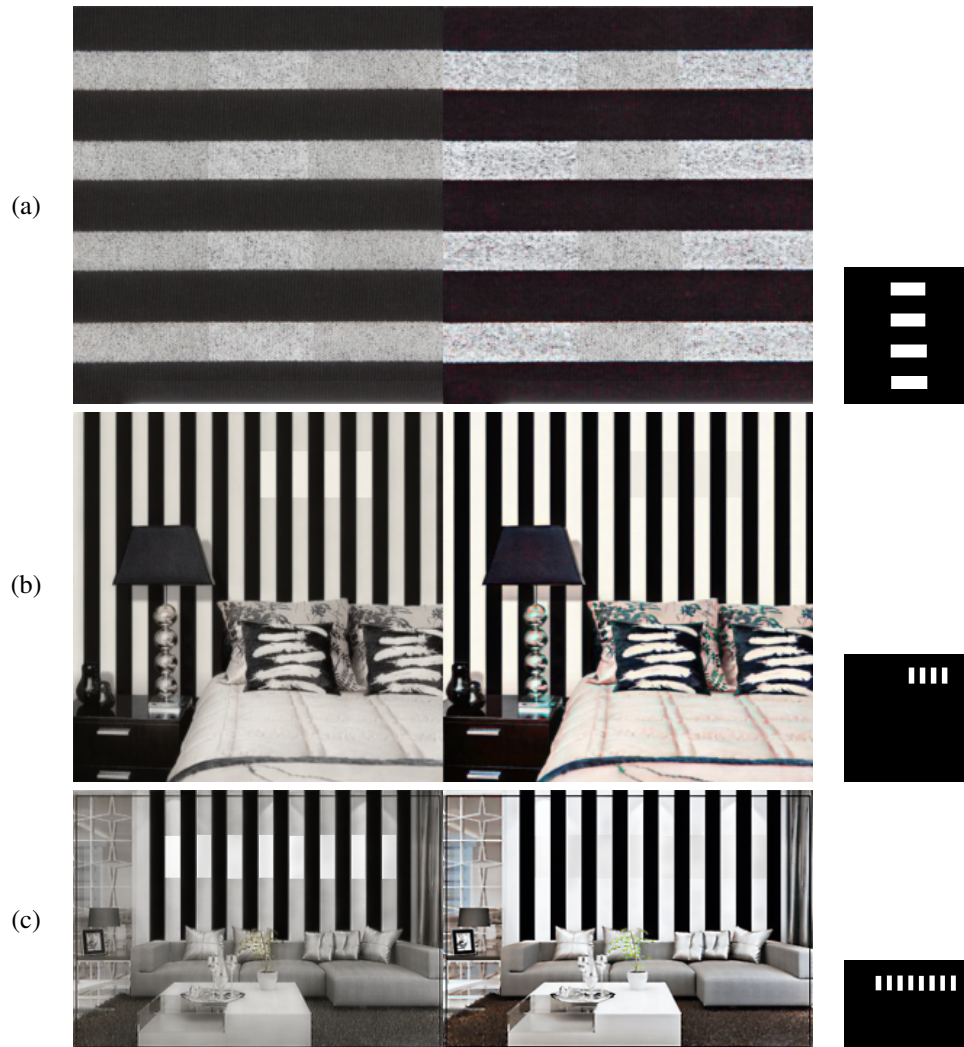

Figure 2: **White's-like Visual illusions.** The masked (white) area is the same in the left and right images.

Additional examples of Hermann-like illusions:

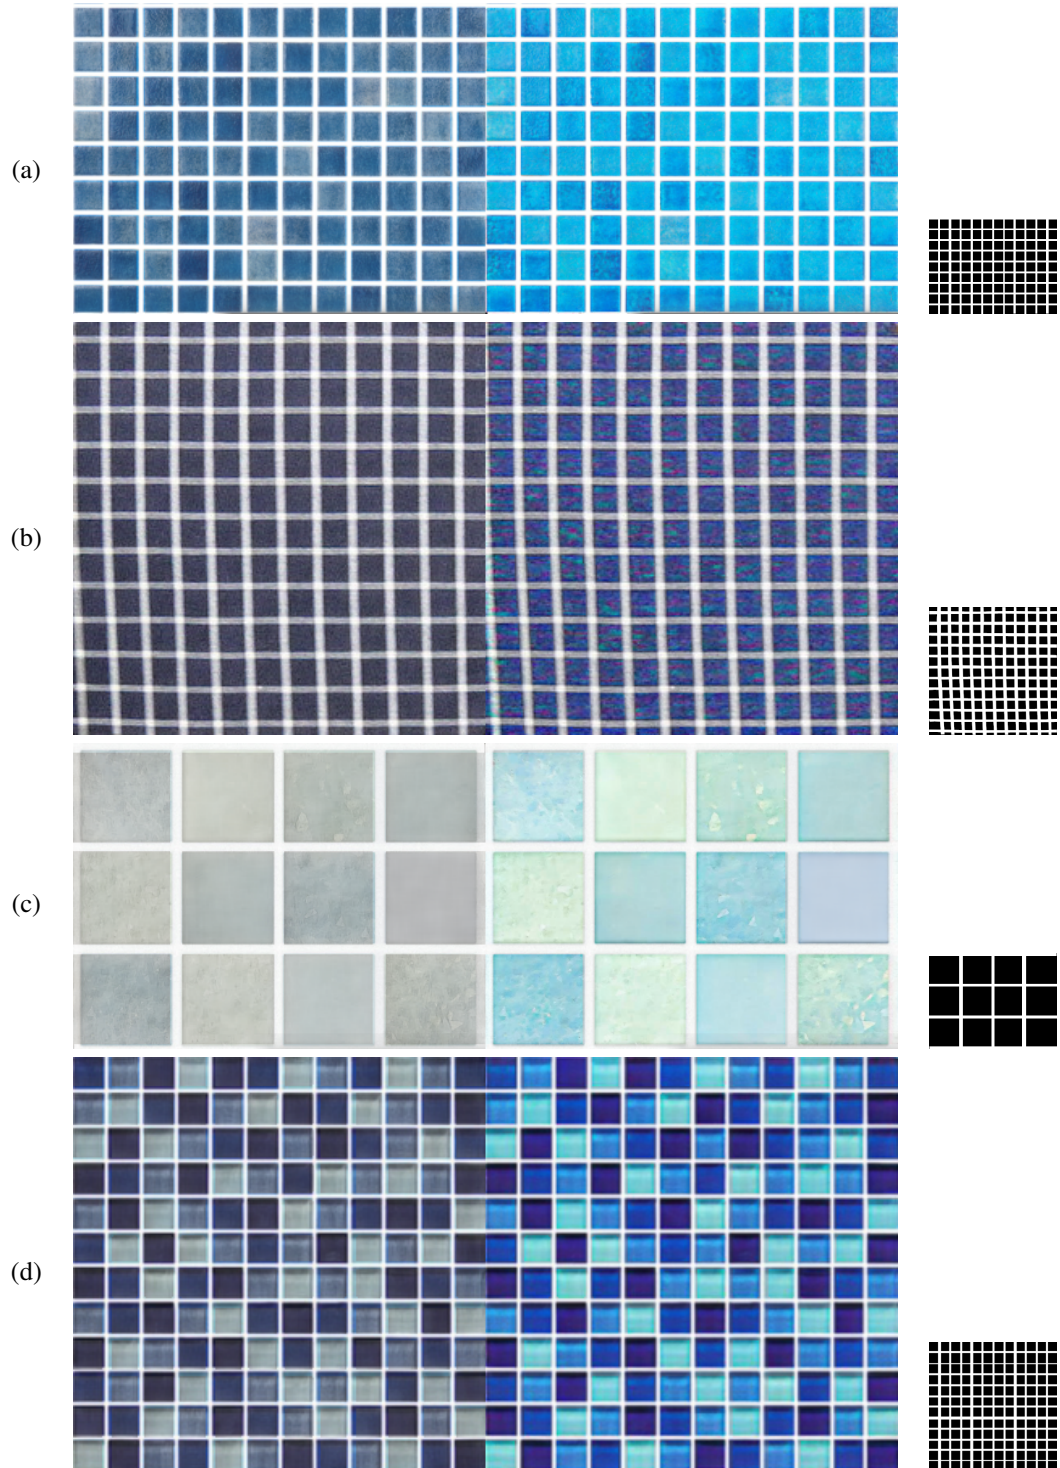

Figure 3: **Hermann-like Visual illusions.** (enhanced in the left, reduced in the right) The masked (white) area is the same in the left and right images.
