# Supplementary material
Source: ML conference proceedings conference paper supplement (https://proceedings.neurips.cc/paper_files/paper/2020/hash/6b39183e7053a0106e4376f4e9c5c74d-Abstract.html)
Supplement: Supplementary file [file 6b39183e7053a0106e4376f4e9c5c74d-Supplemental.zip]

# Supplementary Material - Center of Patch Test

The center of patch test helps us to evaluate the training process, as described in Section 2. Here we provide examples of graphs that show the expected behavior - the maximum likelihood is attained when the center of the patch and its surround are the same. We show it in gray-scale intensity, hue, saturation and value (HSV color space).

Each graph shows the likelihood of the patch, for a given surround, vs. the value of the center. The rows represent the property (intensity, hue, saturation or value) that is being changed for the center area, and the columns represent the corresponding value of the surround. For example, in (1,1) the surround has a gray-scale value of 60/255 and the gray-scale value of the center varies from 0 to 255, while in (2,2) the surround has a hue of 120/255 and the hue of the center varies from 0 to 255. Moreover, note that the range of hue values is cyclic.

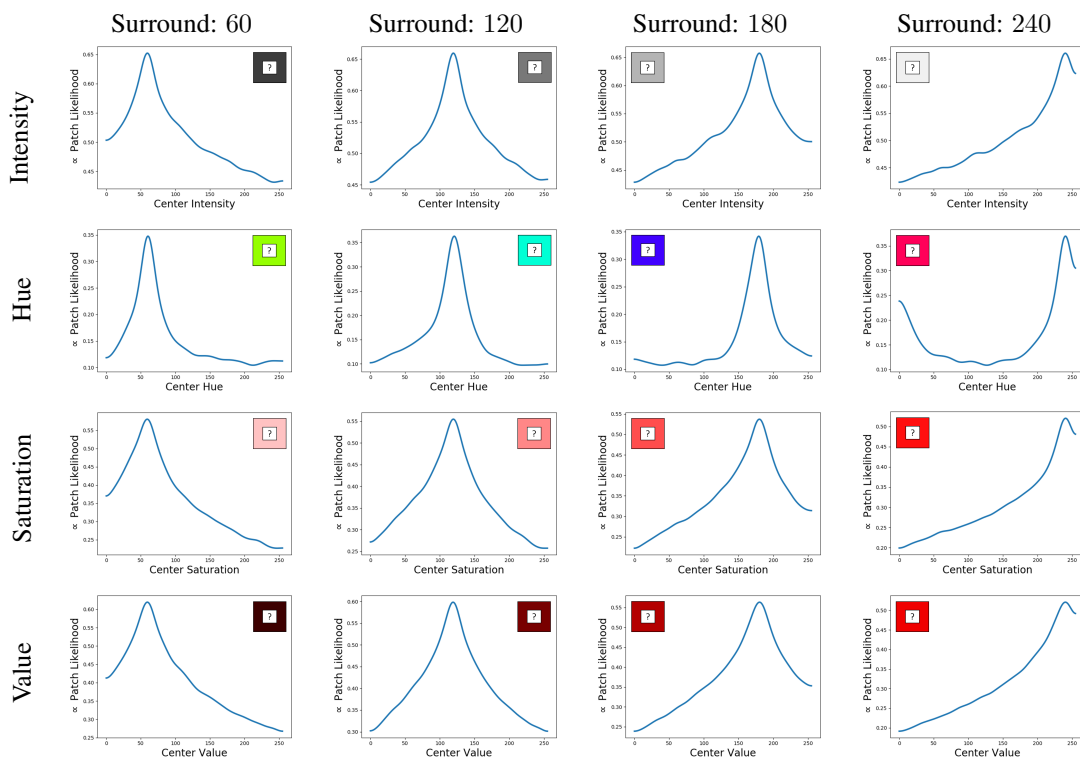

Figure 1: Likelihood of patches for a given surround vs. value of the patch center.
