# Supplementary material
Source: ML conference proceedings conference paper supplement (https://proceedings.neurips.cc/paper_files/paper/2020/hash/6b39183e7053a0106e4376f4e9c5c74d-Abstract.html)
Supplement: Supplementary file [file 6b39183e7053a0106e4376f4e9c5c74d-Supplemental.zip]

---

## Supplementary Material - Min-Max Patch Test

---

We provide more examples of the min-max patch test, used in Section 2. The patches of each image were sorted by their likelihood scores:

1. When our model was trained on a single image (the source image; internal statistics)
2. When our model was trained on Places dataset (external statistics)

This experiment is used for a qualitative evaluation of the training process. We present a sample of the top/least 100 likely patches w.r.t. the internal/external statistics.

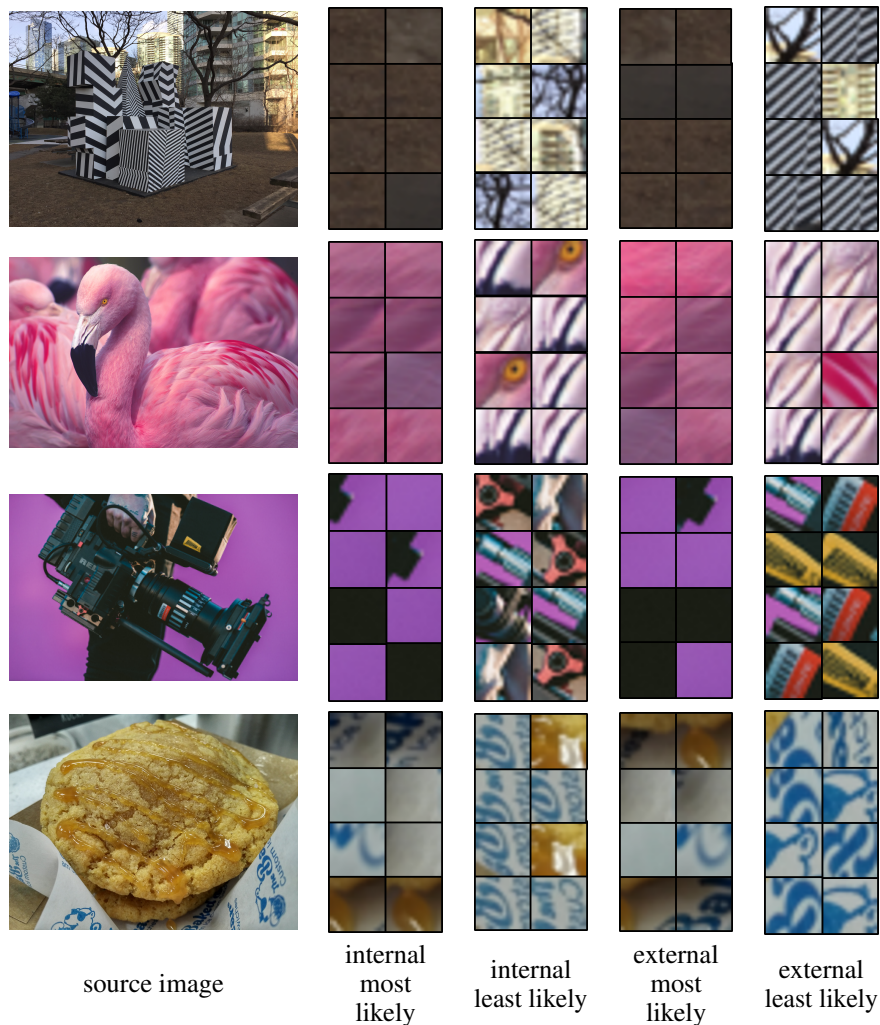

Figure 1: **Min-Max patches.** Samples from 100 most-likely and 100 least-likely patches of images, w.r.t. the internal image statistics (trained on a single image) & the external statistics (trained on Places dataset).
